# Supplementary material for: What is climate change doing in Himalaya? Thirty years of the Pyramid Meteorological Network (Nepal)
Source: Copernicus journal article supplement (doi:10.5194/essd-2024-591), 2025-01-20
Supplement: Supplementary file [file essd-2024-591-RC2-supplement.pdf]

## **Review of “What is climate change doing in Himalaya? Thirty years of the Pyramid Meteorological Network (Nepal)” written by Franco Salerno and 8 others.**

The author published the one of the very interesting and important AWS data set from different elevation AWSs from the Khumbu region, well researched are in the Himalaya. The work done on Khumbu since 1990s, establishing the network of stations and maintaining them for long term is one of the challenging and expensive work. These data have been used in many work and insightful results are already published and would be very helpful for the further research in the region. I would like to thanks to the all the hands who have been involved in the work since the beginning to till date for the development, maintaining and collecting data in these works.

Comments:

As there are overlapping 2000-2007 of the AWS data at 5035 elevation, and at that period the temperature data are not similar to each other. Do you have any idea why they are not similar?

The maximum temperature trend in both here and Salerno et al 2023 is decreasing after 2000, when there is a new station installed at pyramid. This might be because of the new stations. What do you define this?

Also different international groups has installed the AWS at Pyramid since many years, have tried to compare the data from EvK2CNR networks data to other stations from the same place?

There was big/typhoon events in October 2013 and 2014 (Shea et al 2015), around 80 and 40 mm of precipitation. In the data from pyramid I think its not visible. I believe these kind of big events and precipitation would play important role for climate analysis and modeling. How do other user would incorporate such problem in data? Or how the public can identify such error in future? Any suggestion or comments page for the public users?

The data is easy to visualize in <https://geoportal.mountaingenius.org/portal/> but not downloadable form here. So do you have any plans to modify it or you also keep the zenodo links for the download.

Line by line comments:

L41: the reverence should be updated with the recent one

L57: correct the reference

L90: add some old reference from the Japanese researcher

L101-103: the 90% of precipitation during the monsoon is quite different than the result from Khadka et al 2022 and shea et al 2015, quite surprising.

L131: new one installed during 2022 at 8810 m?

L134: I think its better to modify the reverence as the Wagnon et al 2021 focused only on Mera Glacier.

L441: is that the kala pathhar aws is in the glacier

Table 2: it would be easier to follow I the order of the awss is same as table 1 and same for the table 3.

Table 3: is the aws4(z5035) is at 5035m?
